# Supplementary material for: Efficacy of Abiraterone Acetate For High-Risk Hormone-Naïve Metastatic Prostate Cancer: A Comparison With Combined Androgen Blockade Therapy With Bicalutamide And Androgen Deprivation Therapy Alone
Source: Research Square preprint supplement (doi:10.21203/rs.3.rs-618611/v1), 2021-06-23
Supplement: Supplementary file 1 [file 1a1e1649b8ed8090cdfa7891.xlsx]

## Sheet: Sheet1
	Table 1 Baseline characteristics of patients
		Abiraterone (ABI; n=30)	CAB with bicalutamide (CAB; n=83)	ADT alone (ADT; n=33)	p value
	Median age at diagnosis (range), years	68 (54-82)	72 (49-91)	71 (47-84)	0.44
	Median PSA at diagnosis (range), ng/mL	531 (7.7-23022)	381 (8.6-8855)	361 (6.5-7155)	0.054
	Clinical T stage, n (%)				0.211
	<T3	23 (77)	64 (77)	30 (91)
	T4	7 (23)	19 (23)	3 (9)
	Gleason score, n (%)				0.111
	4+4	9 (30)	41 (49)	12 (36)
	4+5	16 (53)	19 (23)	11 (33)
	5+4	4 (13)	16 (19)	7 (21)
	5+5	1 (3)	7 (8)	3 (9)
	Bone metastasis, n (%)				0.323
	No	3 (10)	3 (4)	1 (3)
	Yes	27 (90)	80 (96)	32 (97)
	Regional node metastasis, n (%)				0.937
	No	13 (43)	38 (46)	14 (42)
	Yes	17 (57)	45 (54)	19 (58)
	Visceral metastasis, n (%)				0.802
	No	22 (73)	62 (75)	28 (85)
	Yes	8 (27)	21 (25)	5 (15)

## Sheet: Sheet2
	Table 2 Treatment outcomes of patients
	Variables	Abiraterone (ABI; n=30)	CAB with bicalutamide (CAB; n=83)	ADT alone (ADT; n=33)	p value
	Median observation time, months (range)	12.6 (3-90)	9.6 (1-115)	9.6 (3-52)	0.458
	Patients progressed to CRPC, n (%)	9 (30)	69 (83)	27 (82)	<0.001
	Median TTCR, months (95% CI)	not reached	10.7 (7.6-13.8)	11.0 (7.9-12.4)	0.002
	PSA nadir, median (range), ng/mL	0.094 (<0.008-9.7)	1.21 (<0.008-2672)	2.818 (0.041-234)	<0.001
	PSA decline, n (%)
	Any	30 (100)	81 (98)	33 (100)	0.4632
	>90%	30 (100)	75 (90)	28 (85)	0.1015
	Patients reaching PSA <0.2ng/mL, n (%)	19 (63)	21 (25)	1(3)	<0.001
